# Supplementary material for: Application of a Custom Device to Measure Isometric Knee Strength: Possible Injury Correlation in Professional Soccer (Football) Players
Source: MDPI journal article supplement (doi:10.3390/jfmk8040141), 2023-10-05
Supplement: s1 [file s1]

**Table S1.** Results of the multivariate logistic regression. The analysis was carried out on the basis of the selection of the most significant variables and the imposition of the condition of non-correlation.

|                         | <i>Regression<br/>coefficients<br/>(B)</i> | <i>Standard error</i> | <i>Wald test</i> | <i>P-value<br/>(<math>&lt;0.05</math>)</i> | <i>Odds ratio<br/>(OR)</i> | <i>OR confidence interval 95%</i> |              |
|-------------------------|--------------------------------------------|-----------------------|------------------|--------------------------------------------|----------------------------|-----------------------------------|--------------|
|                         |                                            |                       |                  |                                            |                            | <i>Lower</i>                      | <i>Upper</i> |
| <b>Age</b>              | 0.023                                      | 0.051                 | 0.204            | 0.652                                      | 1.023                      | 0.926                             | 1.130        |
| <b><math>E_r</math></b> | 0.269                                      | 0.311                 | 0.748            | 0.387                                      | 1.309                      | 0.711                             | 2.410        |
| <b>BMI</b>              |                                            |                       |                  |                                            |                            |                                   |              |
| <b>EBR</b>              | -0.155                                     | 0.068                 | 5.239            | <b>0.022*</b>                              | 0.857                      | 0.750                             | 0.978        |
| <b><math>E_l</math></b> | -0.100                                     | 0.251                 | 0.158            | 0.691                                      | 0.905                      | 0.553                             | 1.480        |
| <b>BMI</b>              |                                            |                       |                  |                                            |                            |                                   |              |
| <b><math>F_r</math></b> | -0.199                                     | 0.491                 | 0.164            | 0.685                                      | 0.820                      | 0.313                             | 2.145        |
| <b>BMI</b>              |                                            |                       |                  |                                            |                            |                                   |              |
| <b>FBR</b>              | 0.085                                      | 0.040                 | 4.559            | <b>0.033*</b>                              | 1.089                      | 1.007                             | 1.177        |
| <b><math>F_l</math></b> | -0.011                                     | 0.321                 | 0.001            | 0.972                                      | 0.989                      | 0.527                             | 1.855        |
| <b>BMI</b>              |                                            |                       |                  |                                            |                            |                                   |              |
| <b>RUR</b>              | 0.032                                      | 0.122                 | 0.068            | 0.794                                      | 1.032                      | 0.813                             | 1.312        |
| <b>LUR</b>              | -0.028                                     | 0.086                 | 0.107            | 0.743                                      | 0.972                      | 0.821                             | 1.151        |

$E_r$ : maximum force of right knee extensors;  $E_l$ : maximum force of left knee extensors;  $F_r$ : maximum force of right knee flexors;  $F_l$ : maximum force of left knee flexors; EBR: Extensor Bilateral Ratio; FBR: Flexor Bilateral Ratio; RUR: Right Unilateral Ratio; LUR: Left Unilateral Ratio. \*: Statistically different values.

**Table S2.** Results of the Cox regression: multivariate survival analysis at 8 degrees of freedom.

|                   | <i>Regression<br/>coefficients<br/>(B)</i> | <i>Standard error</i> | <i>Wald test</i> | <i>P-value<br/>(<math>&lt;0.05</math>)</i> | <i>Hazard ratio<br/>(HR)</i> | <i>HR confidence interval 95%</i> |              |
|-------------------|--------------------------------------------|-----------------------|------------------|--------------------------------------------|------------------------------|-----------------------------------|--------------|
|                   |                                            |                       |                  |                                            |                              | <i>Lower</i>                      | <i>Lower</i> |
| $\frac{E_r}{BMI}$ | -0.17                                      | 0.96                  | 0.03             | 0.86                                       | 0.84                         | 0.13                              | -0.17        |
| $\frac{E_l}{BMI}$ | 0.20                                       | 0.60                  | 0.11             | 0.74                                       | 1.23                         | 0.38                              | 0.20         |
| $\frac{F_r}{BMI}$ | -0.22                                      | 0.94                  | 0.06             | 0.81                                       | 0.80                         | 0.13                              | -0.22        |
| $\frac{F_l}{BMI}$ | 0.47                                       | 0.68                  | 0.48             | 0.49                                       | 1.61                         | 0.42                              | 0.47         |
| FBR               | 1.64                                       | 0.58                  | 8.10             | <b>0.01*</b>                               | 5.16                         | 1.67                              | 1.64         |
| EBR               | -12.41                                     | 506.96                | 0.00             | 0.98                                       | 0.00                         | 0.00                              | -12.41       |
| RUR               | 0.70                                       | 0.56                  | 1.60             | 0.21                                       | 2.01                         | 0.68                              | 0.70         |
| LUR               | -0.01                                      | 0.67                  | 0.01             | 0.99                                       | 0.99                         | 0.27                              | -0.01        |

\*: Statistically different values.

**Table S3.** Results of the ROC curves analysis. This method was implemented to maximize the sensitivity and specificity indices to derive optimized thresholds compared to those currently used by therapists.

| <i>Variables</i>  | <i>Current pathological cut-off</i> | <i>Sensitivity</i> | <i>Specificity</i> | <i>Optimized cut-off</i> | <i>Sensitivity</i> | <i>Specificity</i> | <i>Area under the curve (AUC)</i> | <i>P-value</i> |
|-------------------|-------------------------------------|--------------------|--------------------|--------------------------|--------------------|--------------------|-----------------------------------|----------------|
| $\frac{E_r}{BMI}$ | 20                                  | 0.86               | 0.16               | 26.03                    | 0.64               | 0.67               | 0.65                              | <b>0.02*</b>   |
| $\frac{E_l}{BMI}$ | 20                                  | 0.86               | 0.13               | 24.18                    | 0.68               | 0.50               | 0.57                              | 0.32           |
| $\frac{F_r}{BMI}$ | 15                                  | 0.55               | 0.27               | 16.65                    | 0.51               | 0.82               | 0.34                              | <b>0.02*</b>   |
| $\frac{F_l}{BMI}$ | 15                                  | 0.68               | 0.27               | 20.00                    | 0.41               | 0.84               | 0.54                              | 0.57           |
| <b>EBR</b>        | 18                                  | 0.07               | 1.00               | 8.00                     | 0.47               | 0.77               | 0.41                              | 0.19           |
| <b>FBR</b>        | 18                                  | 0.36               | 0.93               | 17.00                    | 0.41               | 0.91               | 0.68                              | <b>0.01*</b>   |
| <b>RUR</b>        | 40                                  | 0.59               | 0.79               | 39.06                    | 0.68               | 0.76               | 0.75                              | <b>0.01*</b>   |
| <b>LUR</b>        | 40                                  | 0.27               | 0.82               | 33.65                    | 0.59               | 0.64               | 0.56                              | 0.33           |

$E_r$ : maximum force of right knee extensors;  $E_l$ : maximum force of left knee extensors;  $F_r$ : maximum force of right knee flexors;  $F_l$ : maximum force of left knee flexors; EBR: Extensor Bilateral Ratio; FBR: Flexor Bilateral Ratio; RUR: Right Unilateral Ratio; LUR: Left Unilateral Ratio. \*: Statistically different values.
